# Supplementary material for: An integrated microfluidic detection system for the automated and rapid diagnosis of high-risk human papillomavirus
Source: Royal Society of Chemistry journal article supplement (doi:10.1039/d1an00623a), 2021-01-01
Supplement: d1an00623a1.pdf [file d1an00623a1.pdf]

## **Integrated microfluidic detection system for automated and rapid diagnosis of high-risk human papillomavirus**

Xiaoyu Zhao <sup>a#</sup>, Xiang Li <sup>a#</sup>, Weihao Yang <sup>a</sup>, Jiwei Peng <sup>a</sup>, Jiajun Huang <sup>a, b\*</sup> and Shengli Mi <sup>a\*</sup>

<sup>1</sup>Bio-manufacturing Engineering Laboratory, Tsinghua Shenzhen International Graduate School, Tsinghua University, Shenzhen, Guangdong, 518000, China.

<sup>2</sup>Optometry Advanced Medical Equipment R&D Center, Research Institute of Tsinghua University in Shenzhen, Nanshan District, Shenzhen, Guangdong, 518000, China

**\*Corresponding author:**

Shengli Mi

Tsinghua Shenzhen International Graduate School, Tsinghua University,  
Rm 1110, Energy and environment Building, Tsinghua Campus,  
The University Town, Shenzhen 518055, P. R. China

Tel: +86 (0)755 26036329;

Fax: +86(0)755 26036356;

E-mail: mi.shengli@sz.tsinghua.edu.cn

Jiajun Huang

Tsinghua Shenzhen International Graduate School, Tsinghua University,  
Rm 1104, Energy and environment Building, Tsinghua Campus,  
The University Town, Shenzhen 518055, P. R. China

Tel: +86-17707560361;

E-mail: vt\_bongo@hotmail.com

**# These authors contributed equally to this work.**

## Supplemental Information

Supplemental Table 1. The primer set sequences for  $\beta$ -actin qPCR assay

| Item | Sequences (5'-3')    |
|------|----------------------|
| FP   | AGCGAGCATCCCCAAAGTT  |
| BP   | GGGCACGAAGGCTCATCATT |

Supplemental Table 2. The primer set sequences for HPV18 qPCR assay<sup>1</sup>.

| Item | Sequences (5'-3')    | Genome position             |
|------|----------------------|-----------------------------|
| FP   | GCATGGACCTAAGGCAACAT | 3-22                        |
| BP   | GAAGGTCAACCGAATTCAT  | E7 oncogene region<br>56-76 |

Supplemental Table 3. The primer sets sequences for HPV LAMP assay<sup>2,3</sup>.

| Type  | Item | Sequences (5'-3')                                   | Genome position     |
|-------|------|-----------------------------------------------------|---------------------|
| HPV16 | FIP  | GTGGCCCTGTGCTCGTTG-TCTATGGTTACCTCTGATGCC            | 6593-6576/6528-6548 |
|       | BIP  | CACGCAGTACAAATATGTCA-CCCCATGTCGTAGGTACTCC           | 6644-6665/6738-6719 |
|       | F3   | CAAATTATTTCTACACCTAGTGG                             | 6502-6526           |
|       | B3   | GTCATAACGTCTGCAGTTAAGG                              | 6802-6781           |
|       | LF   | GCTGCCATATCTACTTCAGAACTACA                          | 6672-6698           |
| HPV18 | FIP  | GGCACCATATCCAGTATCTACCATA ATTGCCCCCTTTAGAACT        | 6209-6233/6163-6181 |
|       | BIP  | TGCAAGATACTAAATGTGAGGTACC GCAGACATTTGTAAATAATCAGGAT | 6250-6274/6304-6328 |
|       | F3   | CGCGTCCTTTATCACAGG                                  | 6142-6159           |
|       | B3   | TGGAATCCCCATAAGGATC                                 | 6336-6348           |
|       | LF   | TCACCATCTTCCAAAAGT                                  | 6190-6208           |
|       | LB   | ATTGGATATTTGTCAGTCT                                 | 6275-6293           |
| HPV39 | FIP  | AACATATACCATTGTTGTGGCCC-TTCCATGGTAACCTCTGATTCCC     | 6612-6590/6530-6552 |
|       | BIP  | CTACCCGTAGTACCAACTTTAC-CCACGTGCCTGGTATATCC          | 6646-6667/6744-6725 |
|       | F3   | GTTCTGTATACTGCCCTCTC                                | 6502-6522           |
|       | B3   | GACATAACATCAGTTGTTAATGTGAC                          | 6808-6783           |
|       | LF   | CCTTATGTAGCCAATAAGGC                                | 6585-6566           |
| HPV45 | FIP  | ATGACATAACCTCTGCAGTTAAAGT TGTGGAGGAATATGATTTACAGTT  | 6763-6787/6717-6740 |
|       | BIP  | AATTGGAATTTGGTGTCCCTCCAC TGATTGCACAAAACGATA         | 6820-6844/6871-6888 |
|       | F3   | ACTAAGTTTAAGCACTATAGTAGAC                           | 6691-6715           |
|       | B3   | CCTTTTGACAGGTAACAGC                                 | 6892-6910           |
|       | LF   | AGTGCACTGAAAA                                       | 6744-6759           |
|       | LB   | ACCACCTACTACAAGTTTAGTGGA                            | 6843-6866           |
| HPV52 | FIP  | ATTATTGTGGCCCTGCGCAGC-TTCTATGGTAACCTCAGAATCCC       | 6620-6600/6548-6570 |
|       | BIP  | ACCACTCGTAGCACTAACATGAC-TCGCCATGACGAAGGTATTCCT      | 6663-6685/6757-6735 |
|       | F3   | GCCACTGTACAAAGCAGTGC                                | 6507-6526           |
|       | B3   | TGAATGTATGTCATAACATCAGCTG                           | 6829-6805           |
|       | LB'  | GCTGAGGTTAAAAAGGAAAGCAC                             | 6693-6716           |

Note: Dashes in the FIP and BIP primer sequences indicate the two regions linked by a TTTT linker.

Supplemental Table 4. The exact Tt values of the *specificity* experiments results.

| Item  | Time Threshold (min) |
|-------|----------------------|
| HPV16 | 19.91                |
|       | 20.91                |
|       | 20.43                |
| HPV18 | 17.27                |
|       | 17.92                |
|       | 17.65                |
| HPV39 | 9.02                 |
|       | 8.95                 |
|       | 8.61                 |
| HPV45 | 8.06                 |
|       | 7.65                 |
|       | 7.68                 |
| HPV52 | 11.01                |
|       | 10.53                |
|       | 10.81                |

Supplemental Table 5. The exact Tt values of the *stability* experiments results.

| Item  | No.  | Time Threshold (min) |        |
|-------|------|----------------------|--------|
|       |      | Strong               | Weak   |
| HPV16 | 1    | 9.12                 | 14.97  |
|       | 2    | 9.16                 | 15.76  |
|       | 3    | 9.33                 | 15.82  |
|       | 4    | 9.57                 | 16.17  |
|       | 5    | 9.85                 | 16.20  |
|       | 6    | 9.98                 | 16.34  |
|       | 7    | 10.02                | 16.72  |
|       | 8    | 10.15                | 16.89  |
|       | 9    | 10.15                | 16.92  |
|       | 10   | 10.33                | 17.23  |
|       | 11   | 10.57                | 17.27  |
|       | 12   | 10.57                | 17.85  |
|       | SD   | 0.5056               | 0.7933 |
|       | C.V. | 5.11%                | 4.80%  |
| HPV18 | 1    | 11.74                | 14.00  |
|       | 2    | 11.49                | 14.38  |
|       | 3    | 10.91                | 14.14  |
|       | 4    | 10.84                | 12.59  |
|       | 5    | 10.70                | 14.52  |
|       | 6    | 10.57                | 13.52  |
|       | 7    | 10.46                | 13.59  |
|       | 8    | 11.63                | 13.87  |
|       | 9    | 11.29                | 12.97  |
|       | 10   | 10.50                | 13.87  |
|       | 11   | 10.67                | 14.62  |
|       | 12   | 10.88                | 12.97  |
|       | SD   | 0.4504               | 0.6477 |
|       | C.V. | 4.10%                | 4.71%  |
| HPV39 | 1    | 7.13                 | 12.49  |
|       | 2    | 7.37                 | 12.63  |
|       | 3    | 7.37                 | 12.87  |
|       | 4    | 7.89                 | 13.01  |
|       | 5    | 7.96                 | 13.14  |
|       | 6    | 7.99                 | 13.18  |
|       | 7    | 7.99                 | 13.21  |
|       | 8    | 8.02                 | 13.35  |
|       | 9    | 8.02                 | 13.69  |

|       |      |        |        |
|-------|------|--------|--------|
|       | 10   | 8.09   | 13.93  |
|       | 11   | 8.09   | 14.00  |
|       | 12   | 8.57   | 14.18  |
|       | SD   | 0.3957 | 0.5430 |
|       | C.V. | 5.03%  | 4.08%  |
| HPV45 | 1    | 7.58   | 11.49  |
|       | 2    | 7.61   | 11.87  |
|       | 3    | 7.65   | 11.91  |
|       | 4    | 7.68   | 11.91  |
|       | 5    | 7.68   | 12.04  |
|       | 6    | 7.71   | 12.22  |
|       | 7    | 7.89   | 12.70  |
|       | 8    | 7.92   | 12.73  |
|       | 9    | 7.92   | 12.73  |
|       | 10   | 8.02   | 12.80  |
|       | 11   | 8.20   | 12.94  |
|       | 12   | 8.37   | 13.59  |
|       | SD   | 0.2482 | 0.5969 |
|       | C.V. | 3.16%  | 4.81%  |
| HPV52 | 1    | 5.62   | 8.20   |
|       | 2    | 5.72   | 8.95   |
|       | 3    | 5.76   | 9.06   |
|       | 4    | 5.86   | 9.16   |
|       | 5    | 6.00   | 9.16   |
|       | 6    | 6.03   | 9.36   |
|       | 7    | 6.17   | 9.40   |
|       | 8    | 6.24   | 9.64   |
|       | 9    | 6.27   | 9.67   |
|       | 10   | 6.37   | 9.74   |
|       | 11   | 6.51   | 9.81   |
|       | 12   | 6.55   | 9.85   |
|       | SD   | 0.3109 | 0.4720 |
|       | C.V. | 5.10%  | 5.06%  |

Supplemental Table 6. The exact Cycle threshold values and converted Time Threshold values of the HPV18 qPCR experiments results.

| No. | Cycle Threshold | Time Threshold (min) |
|-----|-----------------|----------------------|
| 1   | 21.7            | 16.47                |
| 2   | 20.66           | 15.77                |
| 3   | 20.98           | 15.99                |
| 4   | 20.78           | 15.85                |
| 5   | 20.6            | 15.73                |
| 6   | 20.64           | 15.76                |
| 7   | 21.92           | 16.61                |
| 8   | 20.55           | 15.70                |
| 9   | 19.59           | 15.06                |
| 10  | 19.71           | 15.14                |
| 11  | 20.48           | 15.65                |
| 12  | 19.48           | 14.99                |
| 13  | 17.64           | 13.76                |
| 14  | 20.42           | 15.61                |
| 15  | 23.12           | 17.41                |
| 16  | 20.48           | 15.65                |
| 17  | 20.54           | 15.69                |
| 18  | 21.09           | 16.06                |
| 19  | 19.98           | 15.32                |
| 20  | 20.77           | 15.85                |
| 21  | 20.32           | 15.55                |
| 22  | 20.13           | 15.42                |
| 23  | 20.08           | 15.39                |
| 24  | 21.3            | 16.20                |
| 25  | 22.15           | 16.77                |
| 26  | 22.08           | 16.72                |
| 27  | 24.14           | 18.09                |
| 28  | 22.23           | 16.82                |
| 29  | 21.8            | 16.53                |
| 30  | 22.86           | 17.24                |
| 31  | 21.84           | 16.56                |
| 32  | 22              | 16.67                |
| 33  | 21.89           | 16.59                |
| 34  | 21.57           | 16.38                |
| 35  | 21.96           | 16.64                |
| 36  | 22.02           | 16.68                |
| 37  | 28.5            | 21.00                |
| 38  | 21.98           | 16.65                |

|    |       |       |
|----|-------|-------|
| 39 | 21.6  | 16.40 |
| 40 | 22    | 16.67 |
| 41 | 21.97 | 16.65 |
| 42 | 23.8  | 17.87 |
| 43 | 28.77 | 21.18 |
| 44 | 21.83 | 16.55 |
| 45 | 21.88 | 16.59 |
| 46 | 21.5  | 16.33 |
| 47 | 21.28 | 16.19 |
| 48 | 21.68 | 16.45 |

---

Supplemental Table 7. The exact Tt values of the HPV18 LAMP experiments results.

| No. | Time Threshold (min) |
|-----|----------------------|
| 1   | 9.88                 |
| 2   | 10.91                |
| 3   | 10.50                |
| 4   | 9.09                 |
| 5   | 8.95                 |
| 6   | 12.25                |
| 7   | 12.59                |
| 8   | 10.81                |
| 9   | 10.09                |
| 10  | 11.29                |
| 11  | 11.43                |
| 12  | 8.92                 |
| 13  | 10.02                |
| 14  | 9.40                 |
| 15  | 9.30                 |
| 16  | 9.57                 |
| 17  | 9.71                 |
| 18  | 11.08                |
| 19  | 9.50                 |
| 20  | 9.33                 |
| 21  | 9.02                 |
| 22  | 12.18                |
| 23  | 10.50                |
| 24  | 11.12                |
| 25  | 9.50                 |
| 26  | 9.50                 |
| 27  | 9.50                 |
| 28  | 9.30                 |
| 29  | 13.59                |
| 30  | 12.29                |
| 31  | 11.53                |
| 32  | 12.22                |
| 33  | 12.87                |
| 34  | 11.74                |
| 35  | 11.77                |
| 36  | 11.49                |
| 37  | 10.91                |
| 38  | 10.84                |
| 39  | 10.70                |



|    |       |
|----|-------|
| 40 | 10.57 |
| 41 | 10.46 |
| 42 | 11.63 |
| 43 | 11.29 |
| 44 | 10.50 |
| 45 | 10.67 |
| 46 | 10.88 |
| 47 | 12.66 |
| 48 | 12.90 |
| 49 | 12.59 |
| 50 | 10.05 |
| 51 | 9.09  |
| 52 | 9.23  |

---

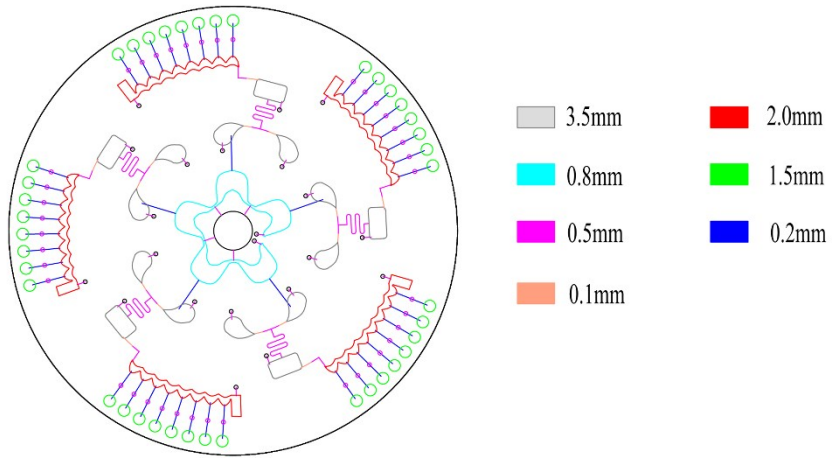

Supplemental Figure 1. Detailed dimensions of the microfluidic chip. The line represents the microchannel and the closed region represents the chamber. The depth is distinguished by different color.

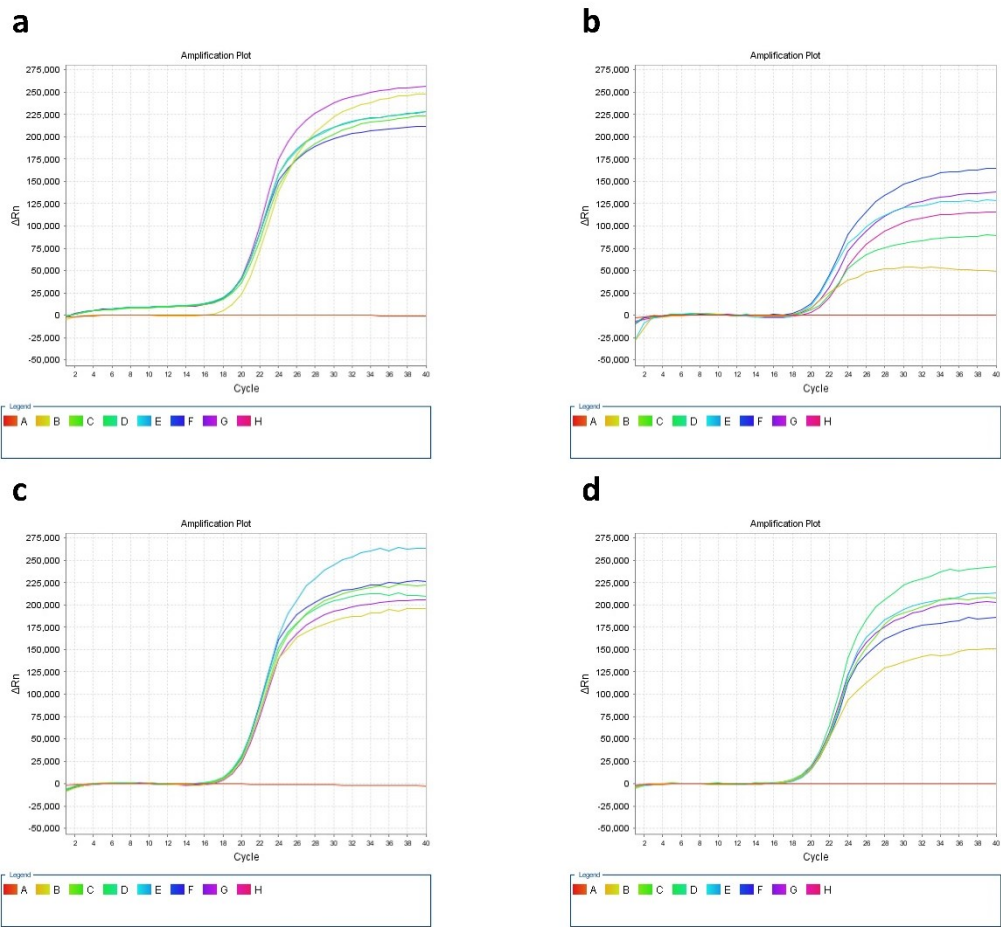

Supplemental Figure 2. The amplification curves of nucleic acid detection based on four purification methods, including (a) microfluidic Chelex-100, (b) pyrolysis, (c) commercial kit A and (d) commercial kit B.

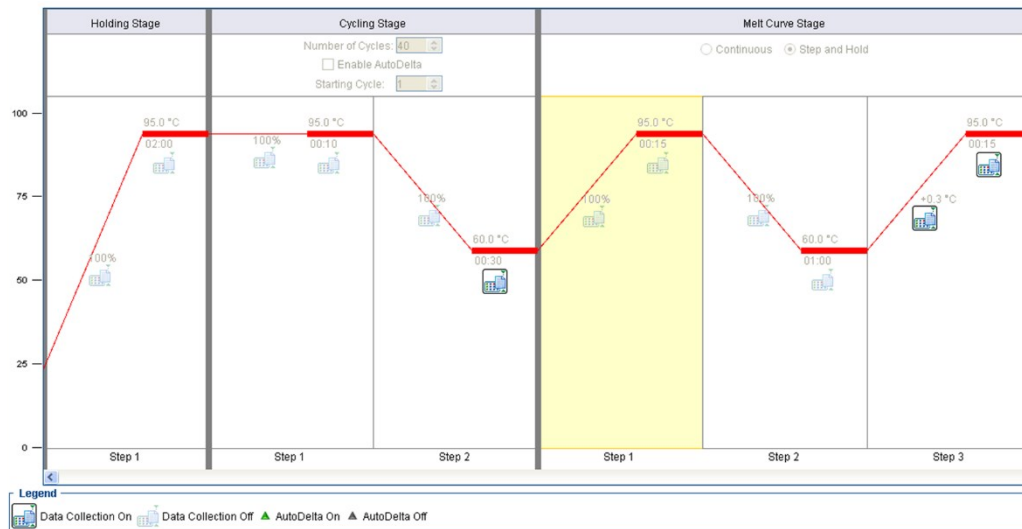

Supplemental Figure 3. The qPCR run methods, including holding stage, cycling stage and melt curve stage, used for conversion from Ct into Tt. The converting equation is  $Tt = Ct * 0.6667 + 2$ .

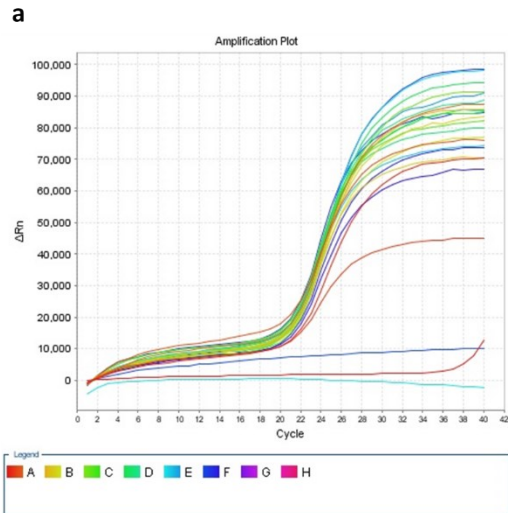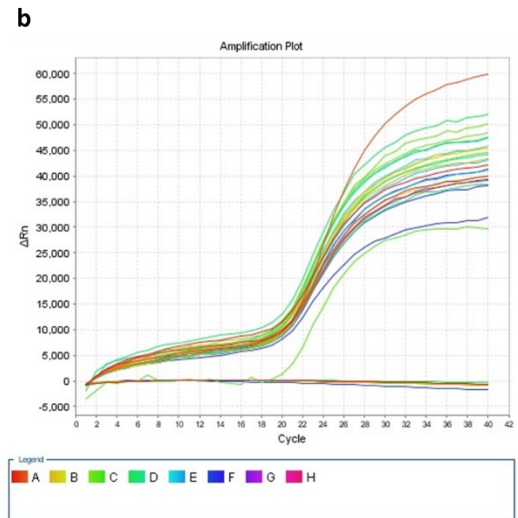

Supplemental Figure 4. The amplification curves of qPCR assay for HPV18 diagnosis. The results of 48 duplicated experiments are divided into two plots: (a) 1<sup>st</sup> to 24<sup>th</sup> results (24 positive and 3 negative controls), (b) 24<sup>th</sup> to 48<sup>th</sup> results (24 positive and 4 negative controls).

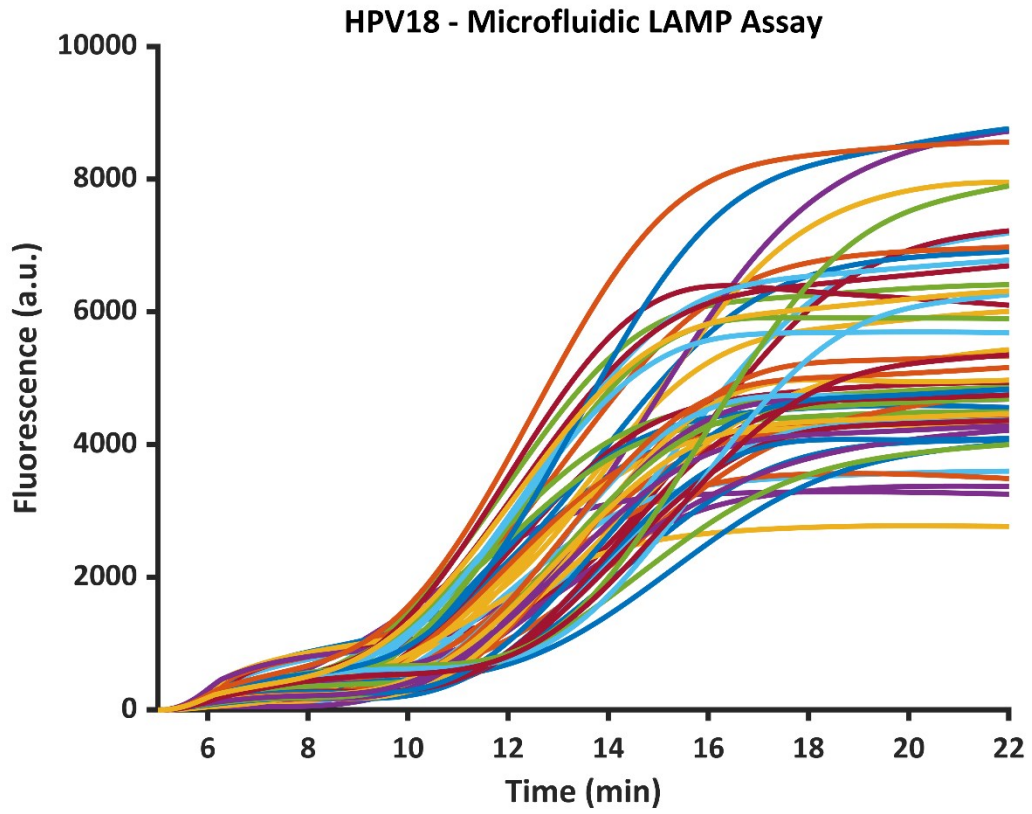

Supplemental Figure 5. The amplification curves of microfluidic LAMP assay for HPV18 diagnosis (n=52, 48 positive sample and 4 false positive). Replicate experiments are displayed in different colors with intention to observe easily.

## Reference

- 1 Y. Wang, S. Springer, C. L. Mulvey, N. Silliman, J. Schaefer, M. Sausen, N. James, E. M. Rettig, T. Guo, C. R. Pickering, J. A. Bishop, C. H. Chung, J. A. Califano, D. W. Eisele, C. Fakhry, C. G. Gourin, P. K. Ha, H. Kang, A. Kiess, W. M. Koch, J. N. Myers, H. Quon, J. D. Richmon, D. Sidransky, R. P. Tufano, W. H. Westra, C. Bettegowda, L. A. Diaz, N. Papadopoulos, K. W. Kinzler, B. Vogelstein and N. Agrawal, *Sci. Transl. Med.*, 2015, **7**, 1–8.
- 2 T. Satoh, K. Matsumoto, T. Fujii, O. Sato, N. Gemma, M. Onuki, H. Saito, D. Aoki, Y. Hirai and H. Yoshikawa, *J. Virol. Methods*, 2013, **188**, 83–93.
- 3 L. Luo, K. Nie, M. J. Yang, M. Wang, J. Li, C. Zhang, H. T. Liu and X. J. Ma, *J. Clin. Microbiol.*, 2011, **49**, 3545–3550.
